# Supplementary material
Source: PubMed Central journal article supplement (PMC5011074)
Supplement: mmc1.pdf [file mmc1.pdf]

**Supplemental Data**

**Mutations in *CEP78* Cause Cone-Rod Dystrophy  
and Hearing Loss Associated with Primary-Cilia Defects**

**Konstantinos Nikopoulos, Pietro Farinelli, Basilio Giangreco, Chrysanthi Tsika, Beryl Royer-Bertrand, Martial K. Mbefo, Nicola Bedoni, Ulrika Kjellström, Ikram El Zaoui, Silvio Alessandro Di Gioia, Sara Balzano, Katarina Cisarova, Andrea Messina, Sarah Decembrini, Sotiris Plainis, Styliani V. Blazaki, Muhammad Imran Khan, Shazia Micheal, Karsten Boldt, Marius Ueffing, Alexandre P. Moulin, Frans P.M. Cremers, Ronald Roepman, Yvan Arsenijevic, Miltiadis K. Tsilimbaris, Sten Andréasson, and Carlo Rivolta**

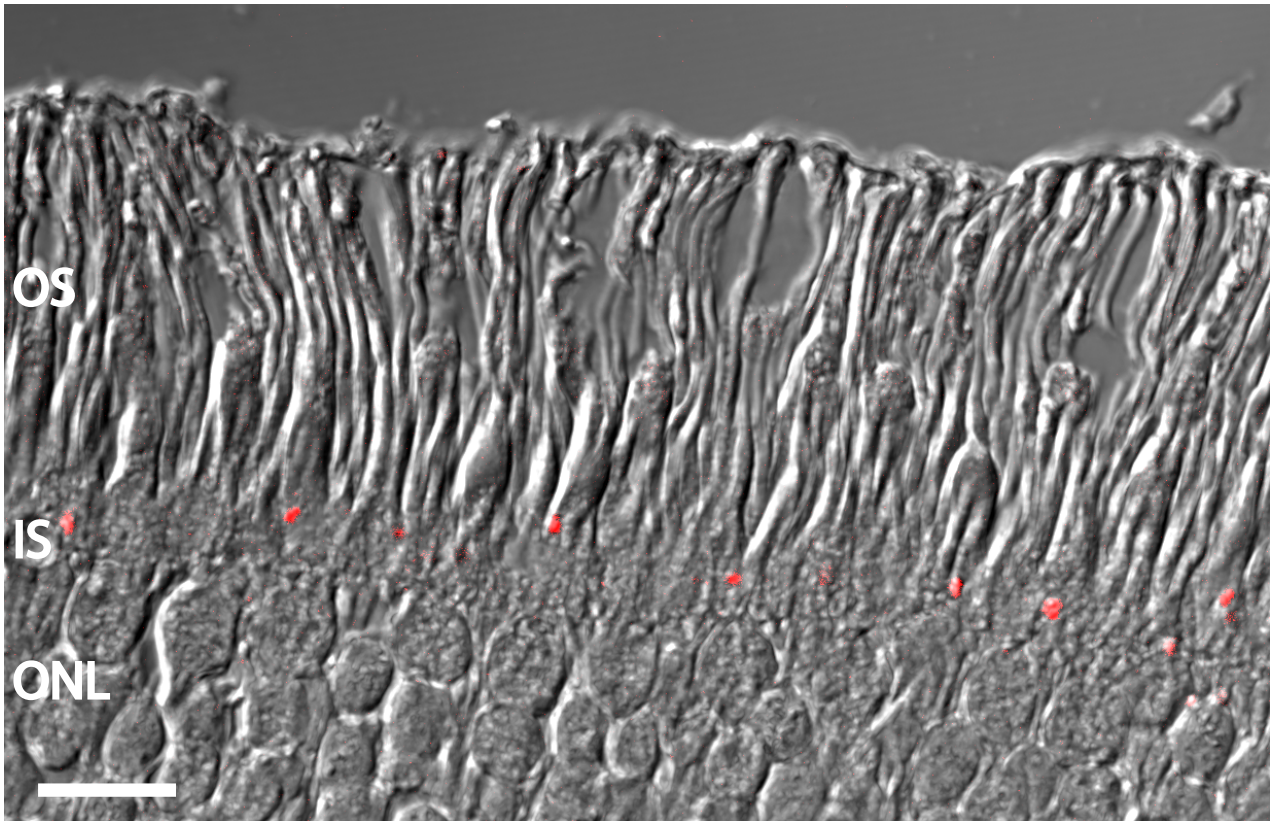

**Figure S1.** Immunostaining of CEP78 in a section of human retina (red dots) reveals its presence in the inner segment (IS) of photoreceptors, likely at the base of the connecting cilium. OS, outer segments; ONL, outer nuclear layer. Scale bar: 10  $\mu\text{m}$ .

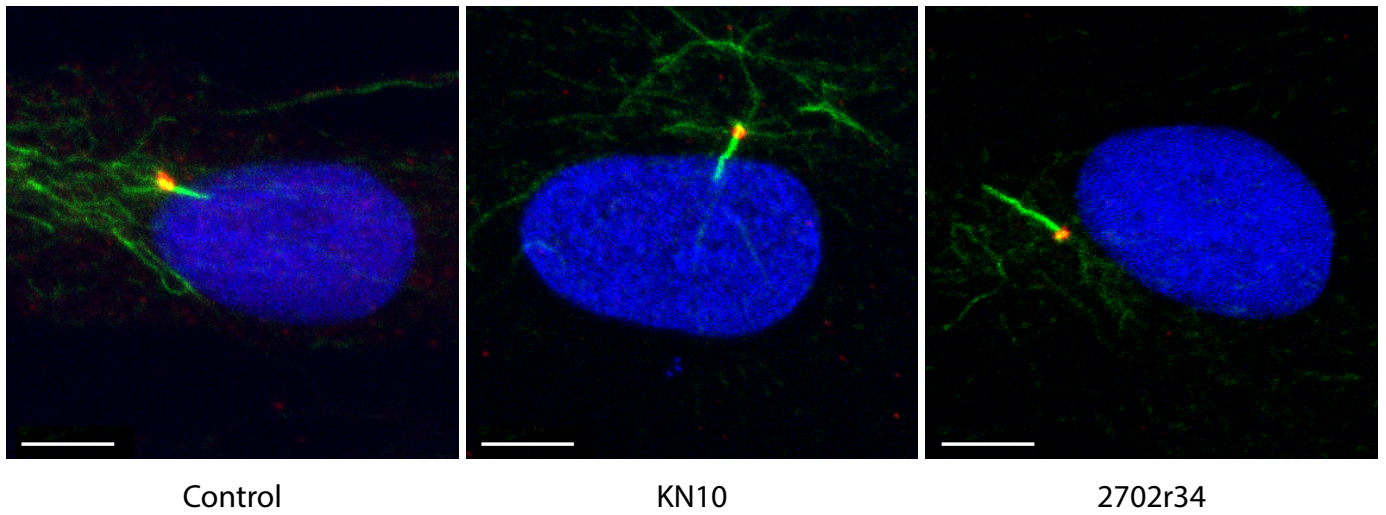

**Figure S2:** Representative samples of the images used for the analysis of cilia lengths, displayed in Figure 6. Green, acetylated tubulin, marking the ciliary axoneme; red, ninein, marking the base of the cilium. Scale bar: 5  $\mu\text{m}$ .

| Patient                                            | KN10                        | 2716s15 |
|----------------------------------------------------|-----------------------------|---------|
| Number of exonic and splicing variants             | 22,956                      | 22,299  |
| Number of non-synonymous variants                  | 11,347                      | 11,012  |
| Number of rare variants (<1%)                      | 663                         | 527     |
| Number of rare variants after quality control (QC) | 335                         | 212     |
| Number of genes with homozygous variants           | 7                           | 3       |
| Number of genes with 2 heterozygous variants       | 15                          | 7       |
| Genes in common                                    | <i>CEP78</i> and <i>TTN</i> |         |

**Table S1. Overview of exonic and splicing variants observed in the two patients, following sequential filtering procedures.** Values refer to number of variants unless specified otherwise. Rare (<1%): Variant frequency = 1% or less in public databases – ExAC, ESP, and Welllderly, 1KG (from Complete Genomics). QC: Rare variants after quality control, i.e. after removal of (1) WES data of poor quality, with less than 15 reads per nucleotide and genotype quality less than 50, (2) variants present in control WES processed by the same pipeline (to remove any technical errors), and (3) variants carried by healthy homozygous individuals in public database (e.g. ExAC). The gene *TTN* appears frequently as a false positive finding in WES studies.

**Table S2. Genes with rare homozygous or compound heterozygous variants**

| ID      | Var_type                | gene    | chr   | begin     | end       | ref       | alt      | zyg | rs          |
|---------|-------------------------|---------|-------|-----------|-----------|-----------|----------|-----|-------------|
| KN10    | nonsynonymous SNV       | NPR1    | chr1  | 153658297 | 153658298 | G         | A        | hom | rs61757359  |
| KN10    | nonsynonymous SNV       | F8      | chrX  | 154182235 | 154182236 | C         | T        | hom | .           |
| KN10    | nonsynonymous SNV       | CHDC2   | chrX  | 36091352  | 36091353  | T         | A        | hom | .           |
| KN10    | nonsynonymous SNV       | GPR112  | chrX  | 135496331 | 135496332 | G         | A        | hom | rs201992547 |
| KN10    | nonsynonymous SNV       | PCDH11X | chrX  | 91133925  | 91133926  | G         | T        | hom | .           |
| KN10    | splicing                | CEP78   | chr9  | 80855281  | 80855282  | G         | T        | hom | .           |
| KN10    | nonsynonymous SNV       | AKAP4   | chrX  | 49958477  | 49958478  | C         | T        | hom | rs141513690 |
| KN10    | splicing                | SKA3    | chr13 | 21746644  | 21746691  | C         | CGCTTTCC | het | .           |
| KN10    | nonsynonymous SNV       | SKA3    | chr13 | 21729945  | 21729946  | T         | A        | het | .           |
| KN10    | nonsynonymous SNV       | DCHS2   | chr4  | 155241752 | 155241753 | C         | T        | het | .           |
| KN10    | nonsynonymous SNV       | DCHS2   | chr4  | 155411721 | 155411722 | G         | A        | het | rs199621086 |
| KN10    | nonsynonymous SNV       | TTN     | chr2  | 179406044 | 179406045 | C         | T        | het | rs55704830  |
| KN10    | nonsynonymous SNV       | TTN     | chr2  | 179529441 | 179529442 | C         | G        | het | .           |
| KN10    | nonsynonymous SNV       | TTN     | chr2  | 179578857 | 179578858 | G         | A        | het | rs72648990  |
| KN10    | nonsynonymous SNV       | TTN     | chr2  | 179602948 | 179602949 | G         | T        | het | rs55906845  |
| KN10    | nonsynonymous SNV       | MUC2    | chr11 | 1092884   | 1092885   | C         | T        | het | rs201415503 |
| KN10    | nonframeshift deletion  | MUC2    | chr11 | 1093438   | 1093439   | GTGACCCC  | G        | het | .           |
| KN10    | nonsynonymous SNV       | MUC2    | chr11 | 1093531   | 1093532   | A         | G        | het | rs56104295  |
| KN10    | nonsynonymous SNV       | MUC2    | chr11 | 1093549   | 1093550   | G         | C        | het | rs79238439  |
| KN10    | nonsynonymous SNV       | MUC2    | chr11 | 1093550   | 1093551   | T         | C        | het | rs55941874  |
| KN10    | nonsynonymous SNV       | MUC2    | chr11 | 1093555   | 1093556   | C         | T        | het | .           |
| KN10    | nonsynonymous SNV       | MUC2    | chr11 | 1093591   | 1093592   | A         | C        | het | rs200739161 |
| KN10    | nonsynonymous SNV       | MUC2    | chr11 | 1093619   | 1093620   | T         | C        | het | .           |
| KN10    | nonsynonymous SNV       | PPCS    | chr1  | 42922318  | 42922319  | G         | A        | het | .           |
| KN10    | nonsynonymous SNV       | PPCS    | chr1  | 42922319  | 42922320  | C         | A        | het | .           |
| KN10    | nonsynonymous SNV       | ABCA2   | chr9  | 139907306 | 139907307 | C         | T        | het | .           |
| KN10    | nonframeshift deletion  | ABCA2   | chr9  | 139908757 | 139908758 | TGGGTCACT |          | het | .           |
| KN10    | nonsynonymous SNV       | ABCB6   | chr2  | 220075811 | 220075812 | C         | T        | het | .           |
| KN10    | nonsynonymous SNV       | ABCB6   | chr2  | 220077164 | 220077165 | C         | T        | het | .           |
| KN10    | nonsynonymous SNV       | TAS2R30 | chr12 | 11286702  | 11286703  | G         | C        | het | rs113026132 |
| KN10    | nonsynonymous SNV       | TAS2R30 | chr12 | 11286746  | 11286747  | A         | G        | het | .           |
| KN10    | nonframeshift insertion | NCOR2   | chr12 | 124887058 | 124887068 | G         | GGCTGCTC | het | .           |
| KN10    | nonsynonymous SNV       | NCOR2   | chr12 | 124968176 | 124968177 | G         | A        | het | .           |
| KN10    | nonsynonymous SNV       | FAM193B | chr5  | 176952101 | 176952102 | C         | T        | het | rs201231555 |
| KN10    | nonsynonymous SNV       | FAM193B | chr5  | 176952178 | 176952179 | T         | G        | het | rs185300146 |
| KN10    | frameshift insertion    | ANKRD36 | chr2  | 97851231  | 97851245  | A         | AACCAAAA | het | .           |
| KN10    | frameshift insertion    | ANKRD36 | chr2  | 97851233  | 97851248  | T         | TGCATCAC | het | .           |
| KN10    | nonsynonymous SNV       | MUC17   | chr7  | 100678079 | 100678080 | A         | T        | het | .           |
| KN10    | nonsynonymous SNV       | MUC17   | chr7  | 100681266 | 100681267 | C         | A        | het | rs142126972 |
| KN10    | nonsynonymous SNV       | MUC4    | chr3  | 195512515 | 195512516 | G         | T        | het | .           |
| KN10    | nonsynonymous SNV       | MUC4    | chr3  | 195513145 | 195513146 | A         | G        | het | .           |
| KN10    | nonsynonymous SNV       | IL1R1   | chr2  | 102782690 | 102782691 | T         | C        | het | rs34889382  |
| KN10    | nonsynonymous SNV       | IL1R1   | chr2  | 102791994 | 102791995 | G         | A        | het | rs34835752  |
| KN10    | nonsynonymous SNV       | ENAM    | chr4  | 71507930  | 71507931  | G         | A        | het | .           |
| KN10    | nonsynonymous SNV       | ENAM    | chr4  | 71510354  | 71510355  | G         | C        | het | .           |
| 2716s15 | nonsynonymous SNV       | PLAC1   | chrX  | 133700133 | 133700134 | A         | G        | hom | .           |
| 2716s15 | nonsynonymous SNV       | MAGIX   | chrX  | 49021639  | 49021640  | C         | T        | hom | rs183982494 |
| 2716s15 | nonsynonymous SNV       | MID1    | chrX  | 10469476  | 10469477  | C         | T        | hom | rs111428432 |
| 2716s15 | nonsynonymous SNV       | DNAH7   | chr2  | 196636502 | 196636503 | C         | G        | het | .           |
| 2716s15 | nonsynonymous SNV       | DNAH7   | chr2  | 196726484 | 196726485 | C         | T        | het | rs201185180 |
| 2716s15 | frameshift deletion     | ZDHHC11 | chr5  | 825327    | 825328    | TAA       | T        | het | rs66846455  |
| 2716s15 | nonsynonymous SNV       | ZDHHC11 | chr5  | 825331    | 825332    | T         | G        | het | .           |
| 2716s15 | frameshift insertion    | ZDHHC11 | chr5  | 825333    | 825336    | C         | CAT      | het | .           |
| 2716s15 | nonsynonymous SNV       | ZDHHC11 | chr5  | 825338    | 825339    | G         | A        | het | rs2335582   |
| 2716s15 | nonsynonymous SNV       | CDC27   | chr17 | 45219702  | 45219703  | T         | C        | het | rs199774308 |
| 2716s15 | nonsynonymous SNV       | CDC27   | chr17 | 45219714  | 45219715  | T         | G        | het | rs77550690  |
| 2716s15 | nonsynonymous SNV       | CDC27   | chr17 | 45219723  | 45219724  | C         | G        | het | rs77609498  |
| 2716s15 | nonsynonymous SNV       | TOPAZ1  | chr3  | 44285446  | 44285447  | A         | G        | het | rs17076541  |
| 2716s15 | nonsynonymous SNV       | TOPAZ1  | chr3  | 44286384  | 44286385  | A         | G        | het | rs17076545  |
| 2716s15 | nonsynonymous SNV       | POMZP3  | chr7  | 76240814  | 76240815  | C         | T        | het | rs17419421  |
| 2716s15 | nonsynonymous SNV       | POMZP3  | chr7  | 76240819  | 76240820  | C         | T        | het | rs17341271  |
| 2716s15 | splicing                | TTN     | chr2  | 179563643 | 179563645 | T         | TA       | het | .           |
| 2716s15 | nonsynonymous SNV       | TTN     | chr2  | 179485184 | 179485185 | T         | C        | het | .           |
| 2716s15 | splicing                | CEP78   | chr9  | 80855285  | 80855286  | G         | A        | het | .           |
| 2716s15 | frameshift deletion     | CEP78   | chr9  | 80858405  | 80858406  | AC        | A        | het | .           |

**Table S3. Cochlear expression (as FPKM) of genes known to be involved in hereditary deafness, and of CEP78**

| Number | gene_id            | gene_name | Coch 1   | Coch 2   | Coch 3   | Average  |
|--------|--------------------|-----------|----------|----------|----------|----------|
| 1      | ENSG00000091010.4  | POU4F3    | 0        | 0        | 0        | 0        |
| 2      | ENSG00000095777.10 | MYO3A     | 0.000635 | 0.004849 | 0.022596 | 0.00936  |
| 3      | ENSG00000179520.6  | SLC17A8   | 0.000389 | 0.000547 | 0.032021 | 0.010986 |
| 4      | ENSG00000167210.12 | LOXHD1    | 0.025365 | 0.060565 | 0.0066   | 0.030843 |
| 5      | ENSG00000179855.5  | GIPC3     | 0.024089 | 0.076229 | 0.039106 | 0.046475 |
| 6      | ENSG00000181585.3  | TMIE      | 0        | 0.06341  | 0.146477 | 0.069962 |
| 7      | ENSG00000139304.8  | PTPRQ     | 0.006097 | 0.112682 | 0.099155 | 0.072645 |
| 8      | ENSG00000167791.7  | CABP2     | 0.040399 | 0.173213 | 0.056216 | 0.089943 |
| 9      | ENSG00000115155.12 | OTOF      | 0.057953 | 0.003852 | 0.223894 | 0.095233 |
| 10     | ENSG00000242866.5  | STRC      | 0.12565  | 0.132264 | 0.119115 | 0.125676 |
| 11     | ENSG00000170615.10 | SLC26A5   | 0.129152 | 0.092504 | 0.255584 | 0.15908  |
| 12     | ENSG00000176058.7  | TPRN      | 0.094411 | 0.104095 | 0.326162 | 0.174889 |
| 13     | ENSG00000214756.3  | METTL12   | 0.564632 | 0.064836 | 4.28E-32 | 0.209823 |
| 14     | ENSG00000187848.8  | P2RX2     | 0.154111 | 0.470321 | 0.119013 | 0.247815 |
| 15     | ENSG00000155719.12 | OTOA      | 0.00562  | 0.127403 | 0.668946 | 0.267323 |
| 16     | ENSG00000165091.11 | TMC1      | 0.264026 | 0.366298 | 0.209721 | 0.280015 |
| 17     | ENSG00000145103.8  | ILD1R1    | 0.221374 | 0.105951 | 0.538851 | 0.288725 |
| 18     | ENSG00000215203.2  | GRXCR1    | 0.012123 | 0.461481 | 0.436519 | 0.303374 |
| 19     | ENSG00000162399.6  | BSND      | 0.152115 | 0.492989 | 0.344713 | 0.329939 |
| 20     | ENSG00000117013.10 | KCNQ4     | 0.095    | 0.904738 | 0.154929 | 0.384889 |
| 21     | ENSG00000187017.10 | ESPN      | 0.194628 | 0.853735 | 0.111057 | 0.386473 |
| 22     | ENSG00000137474.15 | MYO7A     | 0.52261  | 0.257552 | 0.428576 | 0.402913 |
| 23     | ENSG00000146038.7  | DCDC2     | 1.67294  | 0.284403 | 0.334591 | 0.763978 |
| 24     | ENSG00000150275.13 | PCDH15    | 0.253788 | 1.64893  | 0.788694 | 0.897137 |
| 25     | ENSG00000213892.6  | CEACAM16  | 0.013226 | 0.570029 | 2.18102  | 0.921425 |
| 26     | ENSG00000169519.15 | METTL15   | 1.24601  | 0.662215 | 1.06318  | 0.990468 |
| 27     | ENSG00000121957.8  | GPSM2     | 0.283602 | 1.17825  | 1.86853  | 1.110127 |
| 28     | ENSG00000091536.12 | MYO15A    | 1.31241  | 1.0893   | 1.4237   | 1.275137 |
| 29     | ENSG00000159261.6  | CLDN14    | 0.123397 | 0.915213 | 2.79064  | 1.276417 |
| 30     | ENSG00000091137.7  | SLC26A4   | 1.17451  | 1.33071  | 1.34425  | 1.283157 |
| 31     | ENSG00000109927.5  | TECTA     | 2.24775  | 1.5015   | 0.631862 | 1.460371 |
| 32     | ENSG00000136425.8  | CIB2      | 2.28468  | 0.808458 | 1.45781  | 1.516983 |
| 33     | ENSG00000101574.10 | METTL4    | 1.32381  | 1.23014  | 2.15561  | 1.569853 |
| 34     | ENSG00000160183.9  | TMPRSS3   | 2.1716   | 1.13005  | 2.42714  | 1.909597 |
| 35     | ENSG00000152939.10 | MARVELD2  | 1.52109  | 2.19185  | 2.07644  | 1.929793 |
| 36     | ENSG00000155093.13 | PTPRN2    | 1.97559  | 1.41402  | 2.79015  | 2.05992  |
| 37     | ENSG00000107736.15 | CDH23     | 2.65421  | 2.50604  | 1.47115  | 2.210467 |
| 38     | ENSG00000019991.11 | HGF       | 1.20093  | 4.00613  | 1.92118  | 2.37608  |
| 39     | ENSG00000119715.10 | ESRRB     | 1.27515  | 3.85601  | 3.7147   | 2.94862  |
| 40     | ENSG00000130703.11 | OSBPL2    | 4.65872  | 4.52819  | 4.36676  | 4.51789  |
| 41     | ENSG00000148019.8  | CEP78     | 4.50804  | 2.30044  | 6.7815   | 4.529993 |
| 42     | ENSG00000165819.7  | METTL3    | 4.32555  | 5.5211   | 4.21988  | 4.688843 |
| 43     | ENSG00000165792.13 | METTL17   | 6.26857  | 3.73464  | 5.09427  | 5.032493 |
| 44     | ENSG00000105928.9  | DFNA5     | 2.09614  | 3.53489  | 9.83763  | 5.15622  |
| 45     | ENSG00000105357.11 | MYH14     | 5.2459   | 5.24015  | 5.54507  | 5.343707 |
| 46     | ENSG00000131504.11 | DIAPH1    | 6.75299  | 6.37873  | 5.71255  | 6.281423 |
| 47     | ENSG00000174099.6  | MSRB3     | 8.75399  | 4.9088   | 7.14766  | 6.936817 |
| 48     | ENSG00000167815.7  | PRDX2     | 7.68825  | 5.19914  | 8.5183   | 7.13523  |
| 49     | ENSG00000152492.9  | CCDC50    | 5.48502  | 8.655    | 8.96887  | 7.702963 |
| 50     | ENSG00000111913.11 | FAM65B    | 9.52451  | 5.83092  | 7.94286  | 7.766097 |
| 51     | ENSG00000109501.9  | WFS1      | 13.7706  | 3.90427  | 6.26541  | 7.980093 |
| 52     | ENSG00000147224.6  | PRPS1     | 6.76141  | 9.64509  | 7.9225   | 8.109667 |
| 53     | ENSG00000100106.15 | TRIOBP    | 8.23531  | 9.62484  | 8.07235  | 8.644167 |
| 54     | ENSG00000119139.12 | TJP2      | 10.16    | 11.5985  | 5.61086  | 9.12312  |
| 55     | ENSG00000124570.13 | SERPINB6  | 9.76828  | 9.82138  | 8.69881  | 9.42949  |
| 56     | ENSG00000196767.4  | POU3F4    | 14.6888  | 15.8231  | 20.3449  | 16.95227 |
| 57     | ENSG00000105976.10 | MET       | 19.6721  | 23.953   | 8.66128  | 17.42879 |
| 58     | ENSG00000065427.10 | KARS      | 22.3542  | 20.2033  | 24.4067  | 22.3214  |
| 59     | ENSG00000126778.7  | SIX1      | 31.1925  | 21.4469  | 17.086   | 23.2418  |
| 60     | ENSG00000100345.16 | MYH9      | 30.2774  | 26.0357  | 16.2673  | 24.19347 |
| 61     | ENSG00000112319.13 | EYA4      | 30.046   | 16.2611  | 31.7525  | 26.01987 |
| 62     | ENSG00000091482.5  | SMPX      | 15.8038  | 10.495   | 55.7151  | 27.33797 |
| 63     | ENSG00000196586.9  | MYO6      | 28.8111  | 32.6395  | 35.8846  | 32.44507 |
| 64     | ENSG00000006611.11 | USH1C     | 30.8977  | 21.6356  | 50.2302  | 34.2545  |
| 65     | ENSG00000137710.10 | RDX       | 57.7042  | 35.1006  | 32.5633  | 41.78937 |
| 66     | ENSG00000151491.8  | EPS8      | 49.8291  | 34.1867  | 44.4353  | 42.81703 |
| 67     | ENSG00000121742.11 | GJB6      | 157.935  | 24.7138  | 78.0029  | 86.8839  |
| 68     | ENSG00000204248.6  | COL11A2   | 133.261  | 88.6713  | 257.319  | 159.7504 |
| 69     | ENSG00000165474.5  | GJB2      | 384.907  | 81.9362  | 257.936  | 241.5931 |
| 70     | ENSG00000184009.5  | ACTG1     | 808.74   | 427.013  | 462.764  | 566.1723 |
| 71     | ENSG00000100473.11 | COCH      | 3679.96  | 819.586  | 4595.38  | 3031.642 |

Data from: <https://www.tgen.org/home/research/research-divisions/neurogenomics/supplementary-data/inner-ear-transcriptome.aspx>
